# Supplementary material
Source: ML conference proceedings conference paper supplement (https://proceedings.mlr.press/v97/farina19b.html)
Supplement: Supplementary file [file farina19b-supp.pdf]

A. Additional Figures

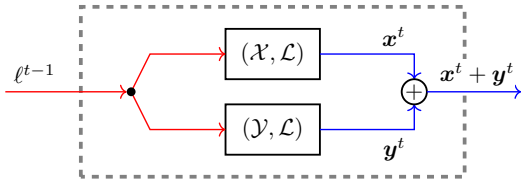

Figure 8. Regret circuit for the Minkowski sum  $\mathcal{X} + \mathcal{Y}$  (Section 4.2).

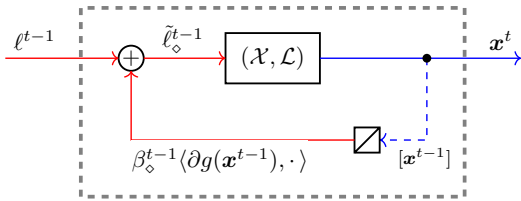

Figure 9. Regret circuit for the Lagrangian relaxation construction (Section 6.1) for the constrained set  $\mathcal{X} \cap \{x : g(x) \leq 0\}$ .
